# Supplementary figures and images for: Lovastatin Production from Cunninghamella blakesleeana under Solid State Fermentation
Source: Research Square preprint supplement (doi:10.21203/rs.3.rs-455135/v1), 2021-05-05

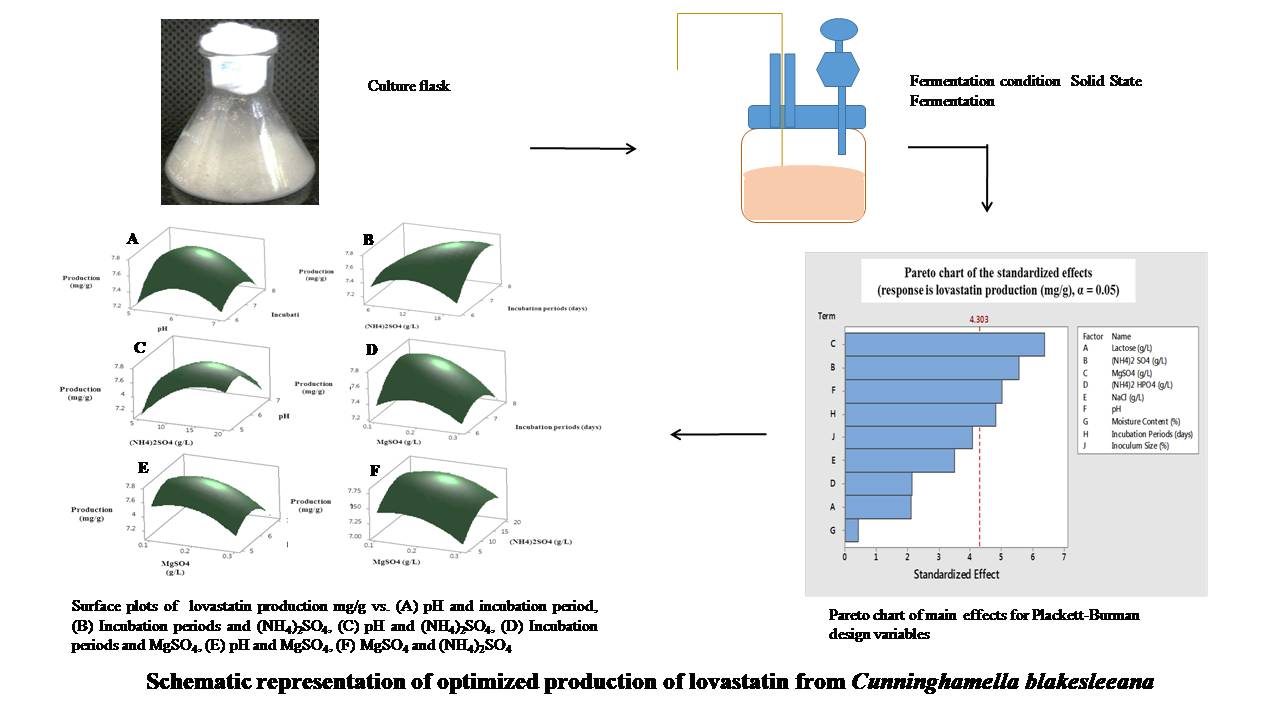

Supplement: Supplementary file 1 [file ad912643b3f36bc013ed0b4b.docx]
